# Supplementary material for: Knockin mouse with mutant Gα11 mimics human inherited hypocalcemia and is rescued by pharmacologic inhibitors
Source: JCI journal article supplement (doi:10.1172/jci.insight.91079), 2017-02-08
Supplement: sd1 [file 1]

Supplementary Material for:

**Knock-in Mouse with mutant Ga11 mimics human inherited hypocalcemia and is rescued by pharmacologic inhibitors**

Kelly L Roszko,<sup>\*1</sup> Ruiye Bi,<sup>\*1,2</sup> Caroline M Gorvin,<sup>3</sup> Hans Bräuner-Osborne,<sup>4</sup> Xiao-Feng Xiong,<sup>4</sup> Asuka Inoue,<sup>5,6</sup> Rajesh V Thakker,<sup>3</sup> Kristian Strømgaard,<sup>4</sup> Thomas Gardella,<sup>1</sup> Michael Mannstadt<sup>1</sup>

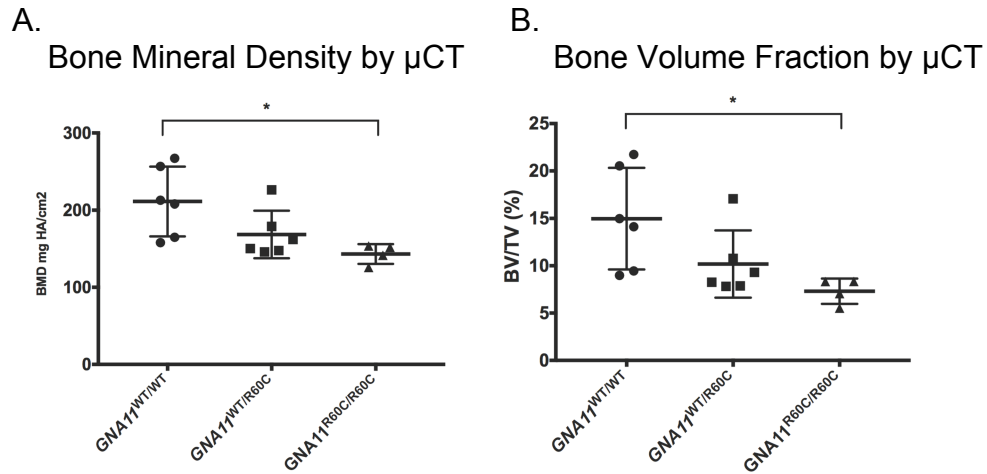

**Supplementary Figure 1**

**Mutant male mice have reduced bone mineral density and bone volume fraction.**

$\mu$ CT analysis revealed significant decreases in bone mineral density (BMD) (A), and bone volume fraction (BV/TV) (B) in 20-week old male *GNA11*<sup>WT/WT</sup> (n=6) vs male *GNA11*<sup>R60C/R60C</sup> (n=4) mice. There was no significant difference between *GNA11*<sup>WT/WT</sup> (n=6) and *GNA11*<sup>WT/R60C</sup> (n=6) mice. Analyses were done by ANOVA with Tukey's multiple comparisons. (\* p<0.03)

A

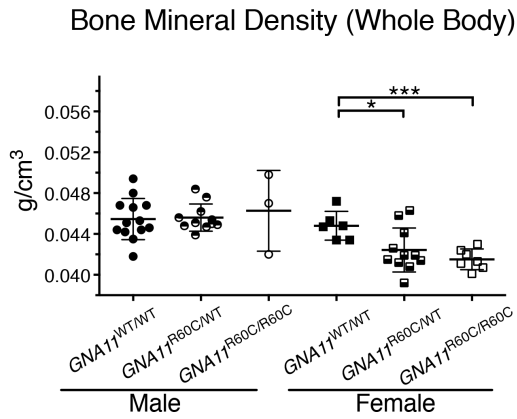

B

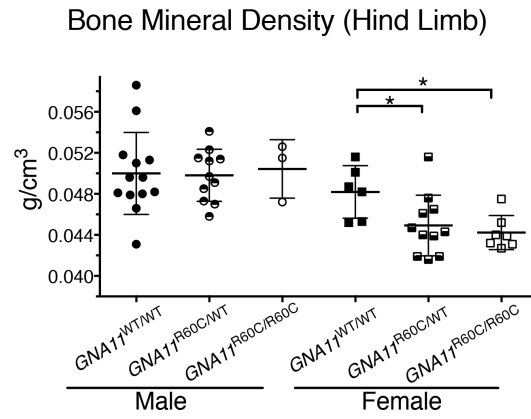

### Supplementary Figure 2.

Whole body (A) and hind limb (B) peripheral dual-energy X-ray absorptiometry (pDXA) in 12-13-week old mice. Wild-type (*GNA11<sup>WT/WT</sup>*): n=13 males, n=6 females; heterozygous (*GNA11<sup>R60C/WT</sup>*): n=11 males, n=11 females, and homozygous (*GNA11<sup>R60C/R60C</sup>*): n=3 males, n=7 females. Data are shown as mean  $\pm$  SD. Female and male groups were each analysed by ANOVA with Tukey's multiple comparisons tests (\* $p < 0.05$ , \*\*\* $p < 0.01$ ).

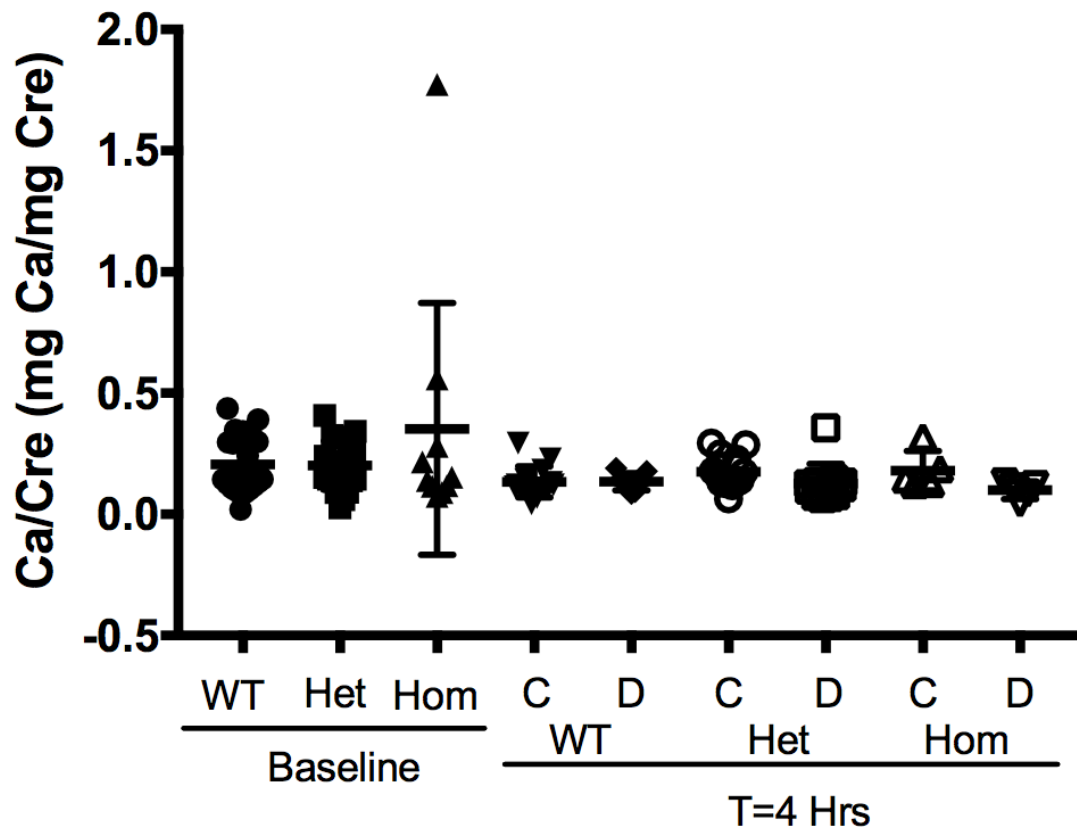

### Supplementary Figure 3.

The urinary calcium to creatinine ratio was determined in wild-type ( $GNAI1^{WT/WT}$ , n=28 baseline, n=14 vehicle, n=10 calcilytic), heterozygous ( $GNAI1^{R60C/WT}$ , n=21 baseline, n=13 vehicle, n=10 calcilytic), or homozygous mice ( $GNAI1^{R60C/R60C}$ , n=9 baseline, n=5 vehicle, n=5 calcilytic) at baseline and four hours after bolus intraperitoneal injection of either vehicle (C) or 28 mg/kg of the calcilytic NPS 2143 (D). Data are shown as mean  $\pm$  SD. There were not significant differences between any of the groups.

|                          | WILD TYPE  |                    |                     |                     |                      | <i>GNA11</i> <sup>R60C/WT</sup> |                    |                     |                     |                      | <i>GNA11</i> <sup>R60C/R60C</sup> |                    |                     |                     |                      |
|--------------------------|------------|--------------------|---------------------|---------------------|----------------------|---------------------------------|--------------------|---------------------|---------------------|----------------------|-----------------------------------|--------------------|---------------------|---------------------|----------------------|
|                          | Baseline   | 4-hours<br>Vehicle | 4-hours<br>NPS 2143 | 24-hours<br>Vehicle | 24-hours<br>NPS 2143 | Baseline                        | 4-hours<br>Vehicle | 4-hours<br>NPS 2143 | 24-hours<br>Vehicle | 24-hours<br>NPS 2143 | Baseline                          | 4-hours<br>Vehicle | 4-hours<br>NPS 2143 | 24-hours<br>Vehicle | 24-hours<br>NPS 2143 |
| Ionized calcium (mmol/l) | 1.25±0.027 | 1.23±0.021*        | 1.35±0.10*          | 1.23±0.029          | 1.26±0.031           | 1.20±0.045                      | 1.20±0.045*        | 1.35±0.093*         | 1.20±0.039          | 1.20±0.046           | 1.12±0.051                        | 1.10±0.04*         | 1.27±0.04*          | 1.14±0.046          | 1.12±0.065           |
| Phosphate (mg/dl)        | 5.90±1.24  | 6.0±1.09*          | 9.06±2.96*          | 2.74±1.43           | 2.85±1.15            | 6.33±1.02                       | 6.40±1.48          | 8.15±1.42           | 2.32±1.21           | 5.65±6.26            | 7.19±1.11                         | 8.42±1.25          | 7.70±2.22           | 4.12±2.71           | 3.33±0.53            |
| PTH (pg/ml)              | 211±221    | 196±103*           | 2,704±1,816*        | 190±57              | 148±53               | 146±159                         | 207±177*           | 1,614±976*          | 138±61              | 413±674              | 119±129                           | 362±259*           | 1,022±581*          | 179±98              | 93±30                |
| FeCa (%)                 | 1.72±1.06  | 1.23±0.60          | 1.11±0.32           |                     |                      | 1.91±0.98                       | 1.66±0.66*         | 0.87±0.25*          |                     |                      | 2.03±1.68                         | 1.85±0.83*         | 0.90±0.36*          |                     |                      |

**Supplementary Table 1.** Biochemical parameters of 9-week-old wild-type *GNA11*<sup>WT/WT</sup>, heterozygous *GNA11*<sup>R60C/WT</sup>, and homozygous *GNA11*<sup>R60C/R60C</sup> mice at baseline, four and 24 hours after bolus intraperitoneal injection of either vehicle of the calcilytic NPS 2143. All values are expressed as mean ± SD. Statistical analysis was by Student's *t*-test comparing the vehicle and NPS 2143 groups at a given time point.

\* p<0.05 Vehicle vs NPS 2143 treatment.

|                                | WILD-TYPE |                    |                      | <i>GNA11</i> <sup>R60C/WT</sup> |                    |                      | <i>GNA11</i> <sup>R60C/R60C</sup> |                    |                      |
|--------------------------------|-----------|--------------------|----------------------|---------------------------------|--------------------|----------------------|-----------------------------------|--------------------|----------------------|
|                                | Baseline  | 4-hours<br>Vehicle | 4-hours<br>YM-254890 | Baseline                        | 4-hours<br>Vehicle | 4-hours<br>YM-254890 | Baseline                          | 4-hours<br>Vehicle | 4-hours<br>YM-254890 |
| Ionized<br>calcium<br>(mmol/l) | 1.23±0.37 | 1.22±0.036*        | 1.31±0.044*          | 1.20±0.050                      | 1.19±0.062         | 1.24±0.043           | 1.10±0.067                        | 1.12±0.032         | 1.10±0.067           |
| Phosphate<br>(mg/dl)           | 5.68±0.99 | 5.14±1.3           | 4.47±0.97            | 5.15±1.35                       | 5.22±1.23          | 5.18±1.25            | 6.96±1.86                         | 6.02±1.14          | 6.37±1.57            |
| PTH<br>(pg/ml)                 | 257±230   | 215±146*           | 429±280*             | 121±100                         | 198±196            | 232±204              | 108±108                           | 138±89             | 104±50               |
| FeCa<br>(%)                    | 2.41±2.25 | 1.67±1.10          | 0.89±0.58            | 1.93±0.78                       | 0.65±0.32          | 0.75±0.18            | 3.70±2.67                         | 1.78±0.99          | 1.29±0.36            |

**Supplementary Table 2.** Biochemical parameters of 12-week-old wild-type *GNA11*<sup>WT/WT</sup>, heterozygous *GNA11*<sup>R60C/WT</sup>, and homozygous *GNA11*<sup>R60C/R60C</sup> mice at baseline, four and 24 four hours after bolus intraperitoneal injection of either vehicle or the  $G\alpha_{11/q}$  inhibitor YM-254890. All values are expressed as mean ± SD. Statistical analysis was by Student's *t*-test comparing the vehicle to YM-254890 groups at a given time point. \* p<0.05 Vehicle vs YM-254890 treatment.
